# Supplementary material
Source: PubMed Central journal article supplement (PMC4473183)
Supplement: JCM.03507-14_zjm999094328so1.pdf [file JCM.03507-14_zjm999094328so1.pdf]

**TABLE S1** Distribution of isolates showing a conflict between their phenotypic DST data and mutation analysis in different categories.<sup>a</sup>

| Mutated codon <sup>b</sup><br>(No. of isolates) | No. of isolates (% in each category) |                | ID of mixed infections (ID with the secondary peak) |                                 |
|-------------------------------------------------|--------------------------------------|----------------|-----------------------------------------------------|---------------------------------|
|                                                 | R <sup>R</sup>                       | S <sup>R</sup> | R <sup>R</sup>                                      | S <sup>R</sup>                  |
| None (74)                                       | 8 (10.81)                            | 66 (89.19)     | SSCM034, SC262, SSC0407, SC187                      | SSC0617, SSC0619 SC240, (SC023) |
| Single (177)                                    | 165 (93.22)                          | 10 (5.65)      | SC107, SSC0620, (SC187, SC262)                      | SSC0588, SC023                  |
| 146 (4)                                         | 4 (100)                              | 0 (0)          |                                                     |                                 |
| 511 (7)                                         | 5 (71.43)                            | 2 (28.57)      |                                                     | SC023                           |
| 513 (3) <sup>c</sup>                            | 2 (66.67)                            | 0 (0)          |                                                     |                                 |
| 516 (11)                                        | 10 (90.91)                           | 1 (0.09)       |                                                     |                                 |
| 526 (27)                                        | 25 (92.59)                           | 2 (7.41)       |                                                     |                                 |
| 531 (117) <sup>d</sup>                          | 112 (95.73)                          | 4 (3.42)       |                                                     | SSC0588                         |
| 533 (5)                                         | 5 (100)                              | 0 (0)          |                                                     |                                 |
| 572 (1)                                         | 1 (100)                              | 0 (0)          |                                                     |                                 |
| 626 (1)                                         | 1 (100)                              | 0 (0)          |                                                     |                                 |
| 657 (1)                                         | 0 (0)                                | 1 (100)        |                                                     |                                 |
| Multiple (41)                                   | 39 (95.12)                           | 2 (4.88)       | SC081                                               |                                 |
| 144, 526 (1)                                    | 1 (100)                              | 0 (0)          |                                                     |                                 |
| 146, 402 (1)                                    | 1 (100)                              | 0 (0)          |                                                     |                                 |
| 149, 516 (1)                                    | 1 (100)                              | 0 (0)          |                                                     |                                 |
| 195, 531 (1)                                    | 1 (100)                              | 0 (0)          |                                                     |                                 |
| 381, 531 (1)                                    | 1 (100)                              | 0 (0)          |                                                     |                                 |
| 481, 531 (2)                                    | 2 (100)                              | 0 (0)          |                                                     |                                 |
| 505, 511 (1)                                    | 0 (0)                                | 1 (100)        |                                                     |                                 |
| 511, 513 (1)                                    | 1 (100)                              | 0 (0)          |                                                     |                                 |
| 511, 516 (5)                                    | 5 (100)                              | 0 (0)          | SC081                                               |                                 |
| 511, 572 (1)                                    | 0 (0)                                | 1 (100)        |                                                     |                                 |
| 511, 574 (3)                                    | 3 (100)                              | 0 (0)          |                                                     |                                 |
| 513, 574 (1)                                    | 1 (100)                              | 0 (0)          |                                                     |                                 |
| 513, 564 (1)                                    | 1 (100)                              | 0 (0)          |                                                     |                                 |
| 513, 633 (1)                                    | 1 (100)                              | 0 (0)          |                                                     |                                 |
| 516, 572 (2)                                    | 2 (100)                              | 0 (0)          |                                                     |                                 |
| 516, 518 (1)                                    | 1 (100)                              | 0 (0)          |                                                     |                                 |
| 516, 522 (1)                                    | 1 (100)                              | 0 (0)          |                                                     |                                 |
| 518, 533 (1)                                    | 1 (100)                              | 0 (0)          |                                                     |                                 |
| 526, 572 (3)                                    | 3 (100)                              | 0 (0)          |                                                     |                                 |
| 526, 574 (1)                                    | 1 (100)                              | 0 (0)          |                                                     |                                 |
| 526, 531 (1)                                    | 1 (100)                              | 0 (0)          |                                                     |                                 |
| 526, 626 (2)                                    | 2 (100)                              | 0 (0)          |                                                     |                                 |
| 526, 541 (1)                                    | 1 (100)                              | 0 (0)          |                                                     |                                 |
| 530, 531 (3)                                    | 3 (100)                              | 0 (0)          |                                                     |                                 |
| 531, 604 (2)                                    | 2 (100)                              | 0 (0)          |                                                     |                                 |
| 531, 616 (1)                                    | 1 (100)                              | 0 (0)          |                                                     |                                 |

511, 572, 643 (1)    1 (100)            0 (0)

---

<sup>a</sup> A total of 292 isolates that were sequenced on *rpoB* gene were included in this statistical analysis. Two clinical information-lost isolates had a single mutation. The isolates of patients whose ID showed in parentheses were RIF hetero-resistant. R<sup>R</sup> = resistant to RIF, S<sup>R</sup> = susceptible to RIF.

<sup>b</sup> Escherichia coli numbering system for the *rpoB* gene.

<sup>c</sup> Isolate of SC100 had a single mutation at codon 513.

<sup>d</sup> Isolate of SC099 had a single mutation at codon 531.

**Supplemental material legend:**

**TABLE S1** Distribution of isolates showing a conflict between their phenotypic DST data and mutation analysis in different categories.
